# Supplementary material for: Computational screening of functionalized MXenes to catalyze the solid and non-solid conversion reactions in cathodes of lithium–sulfur batteries
Source: Royal Society of Chemistry journal article supplement (doi:10.1039/d1cp05666b), 2022-01-01
Supplement: d1cp05666b1.pdf [file d1cp05666b1.pdf]

# Supporting Information

## **Computational Screening of Functionalized MXenes to Catalyze the Solid and Non-Solid Conversion Reactions in Cathodes of Lithium-Sulfur Batteries**

Lirong Zhang, Wenhui Zhang, Xinzhi Ma, Xitian Zhang\*, Jing Wen\*

*Key Laboratory for Photonic and Electronic Bandgap Materials, Ministry of Education, School of Physics and Electronic Engineering, Harbin Normal University, Harbin 150025, P. R. China*

\*Email: xtzhazhang@hotmail.com (X. Zhang); wenj674@hrbnu.edu.cn (J. Wen)

Note 1:

Gibbs free energy can be expressed as:

$$G(T) = H(T) - TS(T) = E_0 + H_{vib}(T) - TS_{vib}(T)$$

where  $E_0$  is electronic energy.  $H$  and  $S$  represent enthalpy and entropy as a function of temperature  $T$ . The subscript *vib* means that the thermodynamic properties of the adsorption models for  $\text{Li}_2\text{S}_2/\text{Li}_2\text{S}$  with the hosts can be estimated under harmonic approximation, ignoring the contributions of translational and rotational motions to entropy and enthalpy. Vibrational contributions to the entropy ( $S_{vib}$ ) and enthalpy ( $H_{vib}$ ) are given by

$$S_{vib}(T) = \sum_i^{3N} \frac{\hbar\omega_i/k_B T}{\exp(\hbar\omega_i/k_B T)} - \ln \left[ 1 - \exp\left(\frac{-\hbar\omega_i}{k_B T}\right) \right]$$

$$H_{vib}(T) = \sum_i^{3N} \frac{1}{2} \hbar\omega_i + \hbar\omega_i \left[ \exp\left(\frac{\hbar\omega_i}{k_B T}\right) - 1 \right]^{-1}$$

where  $\hbar$  is Plank's constant divided by  $2\pi$ ,  $k_B$  represents Boltzmann constant. So, the Gibbs free energy can be transformed to :

$$G(T) = E_0 + ZPE + \Delta H_{0 \rightarrow T} + TS_{vib}(T)$$

$$ZPE = \sum_i^{3N-3} \frac{1}{2} \hbar\omega_i$$

$$\Delta H_{0 \rightarrow T} = \sum_i^{3N-3} \hbar\omega_i \left[ \exp\left(\frac{\hbar\omega_i}{k_B T}\right) - 1 \right]^{-1}$$

where  $ZPE$  represents the zero-point energy,  $\Delta H_{0 \rightarrow T}$  represents the correction of enthalpy at the room temperature of 300 K. The calculated values of  $E_0$ ,  $ZPE$ ,  $\Delta H_{0 \rightarrow T}$

and  $S_{vib}$  in the reaction  $1/2(\text{Li}_2\text{S}_2 + 2\text{Li}) \rightarrow \text{Li}_2\text{S}$  are shown in Table S1, where  $E_{\text{Li}} = -1.91$  eV.

Table S1 (a) Calculated values of  $E_0$ ,  $ZPE$ ,  $\Delta H_{0 \rightarrow T}$  and  $S_{vib}$  based on the adsorption configurations of  $\text{Ti}_3\text{C}_2\text{T}_x\text{-Li}_2\text{S}_2$  (T=H, O, F, S, Cl, Se, Br, and NH).

|                                   | $\text{Ti}_3\text{C}_2\text{H}_2$  | $\text{Ti}_3\text{C}_2\text{O}_2$  | $\text{Ti}_3\text{C}_2\text{F}_2$  | $\text{Ti}_3\text{C}_2\text{S}_2$    |
|-----------------------------------|------------------------------------|------------------------------------|------------------------------------|--------------------------------------|
| $E_0$ (eV)                        | -509.1422                          | -605.5889                          | -557.1856                          | -544.6192                            |
| $ZPE$ (eV)                        | 0.2013                             | 0.1785                             | 0.1719                             | 0.1775                               |
| $\Delta H_{0 \rightarrow T}$ (eV) | 0.1568                             | 0.1527                             | 0.1811                             | 0.1777                               |
| $S_{vib}$ (eV/K)                  | 0.0010                             | 0.0011                             | 0.0013                             | 0.0013                               |
|                                   | $\text{Ti}_3\text{C}_2\text{Cl}_2$ | $\text{Ti}_3\text{C}_2\text{Se}_2$ | $\text{Ti}_3\text{C}_2\text{Br}_2$ | $\text{Ti}_3\text{C}_2(\text{NH})_2$ |
| $E_0$ (eV)                        | -515.2700                          | -527.8708                          | -495.8616                          | -683.1799                            |
| $ZPE$ (eV)                        | 0.1681                             | 0.1766                             | 0.1796                             | 0.2082                               |
| $\Delta H_{0 \rightarrow T}$ (eV) | 0.1582                             | 0.1773                             | 0.1743                             | 0.1592                               |
| $S_{vib}$ (eV/K)                  | 0.0011                             | 0.0012                             | 0.0012                             | 0.0011                               |

Table S1 (b) Calculated values of  $E_0$ ,  $ZPE$ ,  $\Delta H_{0 \rightarrow T}$  and  $S_{vib}$  based on the adsorption configurations of  $\text{Ti}_3\text{C}_2\text{T}_x\text{-Li}_2\text{S}$  (T=H, O, F, S, Cl, Se, Br, and NH).

|                                   | $\text{Ti}_3\text{C}_2\text{H}_2$  | $\text{Ti}_3\text{C}_2\text{O}_2$  | $\text{Ti}_3\text{C}_2\text{F}_2$  | $\text{Ti}_3\text{C}_2\text{S}_2$    |
|-----------------------------------|------------------------------------|------------------------------------|------------------------------------|--------------------------------------|
| $E_0$ (eV)                        | -504.2282                          | -600.1382                          | -552.0974                          | -540.5736                            |
| $ZPE$ (eV)                        | 0.1520                             | 0.1335                             | 0.1295                             | 0.1494                               |
| $\Delta H_{0 \rightarrow T}$ (eV) | 0.1157                             | 0.1300                             | 0.1101                             | 0.1169                               |
| $S_{vib}$ (eV/K)                  | 0.0007                             | 0.0009                             | 0.0007                             | 0.0007                               |
|                                   | $\text{Ti}_3\text{C}_2\text{Cl}_2$ | $\text{Ti}_3\text{C}_2\text{Se}_2$ | $\text{Ti}_3\text{C}_2\text{Br}_2$ | $\text{Ti}_3\text{C}_2(\text{NH})_2$ |
| $E_0$ (eV)                        | -510.1190                          | -522.8039                          | -490.5958                          | -678.2786                            |
| $ZPE$ (eV)                        | 0.1293                             | 0.1378                             | 0.1293                             | 0.1755                               |
| $\Delta H_{0 \rightarrow T}$ (eV) | 0.1357                             | 0.1247                             | 0.1344                             | 0.1089                               |

|                        |        |        |        |        |
|------------------------|--------|--------|--------|--------|
| $S_{vib}(\text{eV/K})$ | 0.0010 | 0.0008 | 0.0009 | 0.0007 |
|------------------------|--------|--------|--------|--------|

---

Table S2 (a) Calculated formation energies of functionalized  $\text{Ti}_3\text{C}_2$  with  $4e$  sites being occupied in unit of eV per formula unit (eV/f.u.).

|                                       | $\text{Ti}_3\text{C}_2\text{H}_2$  | $\text{Ti}_3\text{C}_2\text{O}_2$  | $\text{Ti}_3\text{C}_2\text{F}_2$  | $\text{Ti}_3\text{C}_2\text{S}_2$    | $\text{Ti}_3\text{C}_2\text{Cl}_2$   |
|---------------------------------------|------------------------------------|------------------------------------|------------------------------------|--------------------------------------|--------------------------------------|
| $E_{\text{Ti}_3\text{C}_2\text{T}_2}$ | -54.83                             | -65.49                             | -60.31                             | -58.77                               | -55.67                               |
| $E_{\text{Ti}_3\text{C}_2}$           | -45.71                             | -45.71                             | -45.71                             | -45.71                               | -45.71                               |
| $2E_T$                                | -6.77                              | -8.78                              | -3.71                              | -8.08                                | -3.59                                |
| $E_f$                                 | -2.35                              | -11.01                             | -10.88                             | -4.98                                | -6.37                                |
|                                       | $\text{Ti}_3\text{C}_2\text{Se}_2$ | $\text{Ti}_3\text{C}_2\text{Br}_2$ | $\text{Ti}_3\text{C}_2\text{Te}_2$ | $\text{Ti}_3\text{C}_2(\text{OH})_2$ | $\text{Ti}_3\text{C}_2(\text{NH})_2$ |
| $E_{\text{Ti}_3\text{C}_2\text{T}_2}$ | -57.01                             | -53.40                             | -54.69                             | -72.12                               | -74.13                               |
| $E_{\text{Ti}_3\text{C}_2}$           | -45.71                             | -45.71                             | -45.71                             | -45.71                               | -45.71                               |
| $2E_T$                                | -6.97                              | -3.28                              | -7.28                              | -15.55                               | -23.40                               |
| $E_f$                                 | -4.34                              | -4.41                              | -1.70                              | -10.86                               | -5.02                                |

Table S2 (b) Calculated formation energies of functionalized  $\text{Ti}_3\text{C}_2$  with  $4f$  sites being occupied in unit of eV per formula unit (eV/f.u.).

|                                       | $\text{Ti}_3\text{C}_2\text{H}_2$  | $\text{Ti}_3\text{C}_2\text{O}_2$  | $\text{Ti}_3\text{C}_2\text{F}_2$  | $\text{Ti}_3\text{C}_2\text{S}_2$    | $\text{Ti}_3\text{C}_2\text{Cl}_2$   |
|---------------------------------------|------------------------------------|------------------------------------|------------------------------------|--------------------------------------|--------------------------------------|
| $E_{\text{Ti}_3\text{C}_2\text{T}_2}$ | -54.00                             | -63.84                             | -59.49                             | -57.95                               | -55.54                               |
| $E_{\text{Ti}_3\text{C}_2}$           | -45.71                             | -45.71                             | -45.71                             | -45.71                               | -45.71                               |
| $2E_T$                                | -6.77                              | -8.78                              | -3.71                              | -8.08                                | -3.59                                |
| $E_f$                                 | -1.52                              | -9.36                              | -10.07                             | -4.17                                | -6.24                                |
|                                       | $\text{Ti}_3\text{C}_2\text{Se}_2$ | $\text{Ti}_3\text{C}_2\text{Br}_2$ | $\text{Ti}_3\text{C}_2\text{Te}_2$ | $\text{Ti}_3\text{C}_2(\text{OH})_2$ | $\text{Ti}_3\text{C}_2(\text{NH})_2$ |
| $E_{\text{Ti}_3\text{C}_2\text{T}_2}$ | -56.45                             | -53.51                             | -54.71                             | -67.59                               | -68.47                               |
| $E_{\text{Ti}_3\text{C}_2}$           | -45.71                             | -45.71                             | -45.71                             | -45.71                               | -45.71                               |
| $2E_T$                                | -6.97                              | -3.28                              | -7.28                              | -15.55                               | -23.40                               |
| $E_f$                                 | -3.78                              | -4.52                              | -1.73                              | -6.33                                | 0.63                                 |

Note 2:

The gas phases were simulated by placing a single molecule ( $\text{H}_2$ ,  $\text{N}_2$ ,  $\text{O}_2$ ,  $\text{F}_2$ ,  $\text{Cl}_2$ ) in a large cubic cell with the lattice constant of 20 Å, where the experimental configurations of  $\text{H}_2$ ,  $\text{N}_2$ ,  $\text{O}_2$ ,  $\text{F}_2$ ,  $\text{Cl}_2$  were employed to simulate the initial molecular states of H, N, O, F and Cl. The solid phases were simulated by employing the reported bulk structures, where bulk S was built based on the space group of  $Fddd$  (No.70), Se based on the space group of  $P3_1I2$  (No.153), and Te based on the space group of  $P3_2I2$  (No.154). According to the experimental density of liquid bromine (3.11 g/cm<sup>3</sup>), we randomly placed 4 bromine molecules in a cubic cell with the lattice constant of 7 Å to simulate its liquid phase.

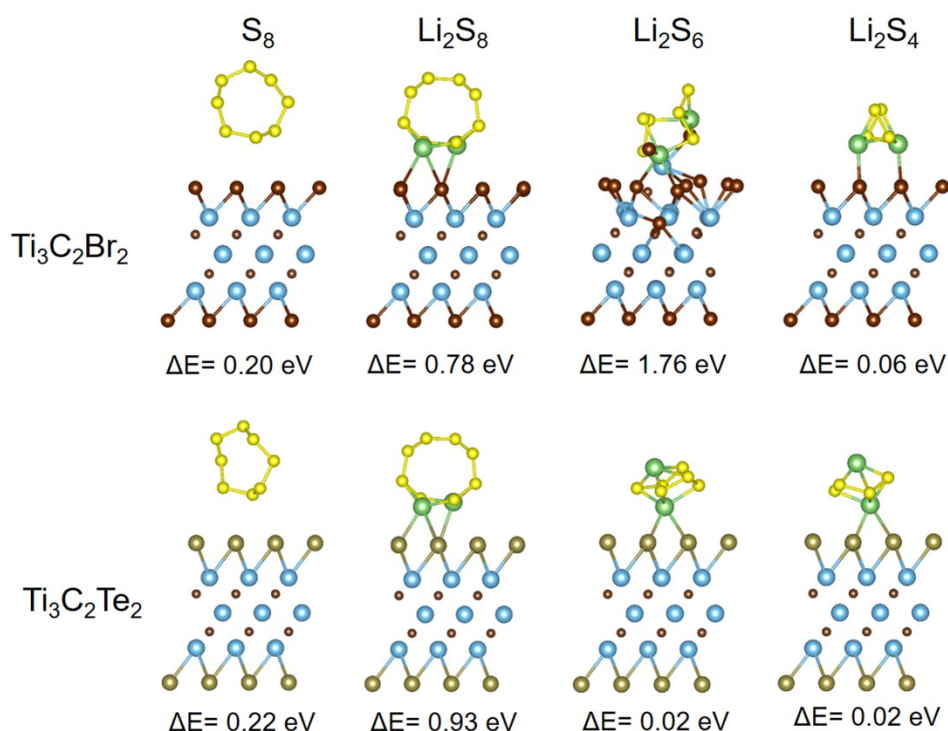

Figure S1 Metastable configurations of  $\text{Ti}_3\text{C}_2\text{Br}_2$  and  $\text{Ti}_3\text{C}_2\text{Te}_2$  adsorbed by  $\text{S}_8$  and  $\text{Li}_2\text{S}_x$  ( $x=4, 6, \text{ and } 8$ ), where  $\Delta E$  represents the energy difference of the metastable adsorption configuration relative to the stable one.

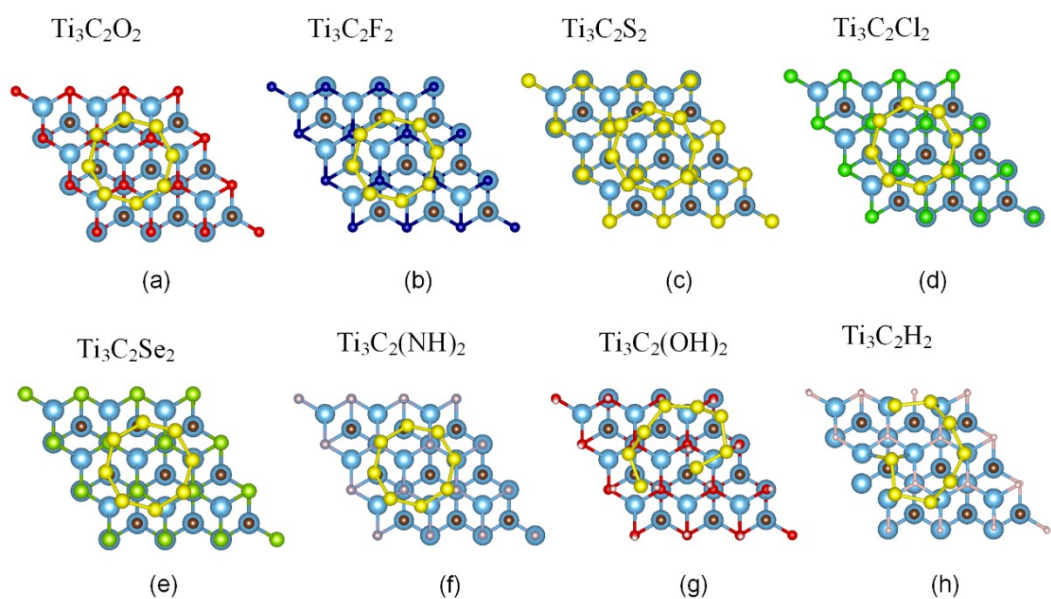

Figure S2. Top views of the adsorption configurations of  $S_8$  on the surfaces of  $Ti_3C_2T_2$  ( $T=O, F, S, Cl, Se, NH, OH,$  and  $H$ ).

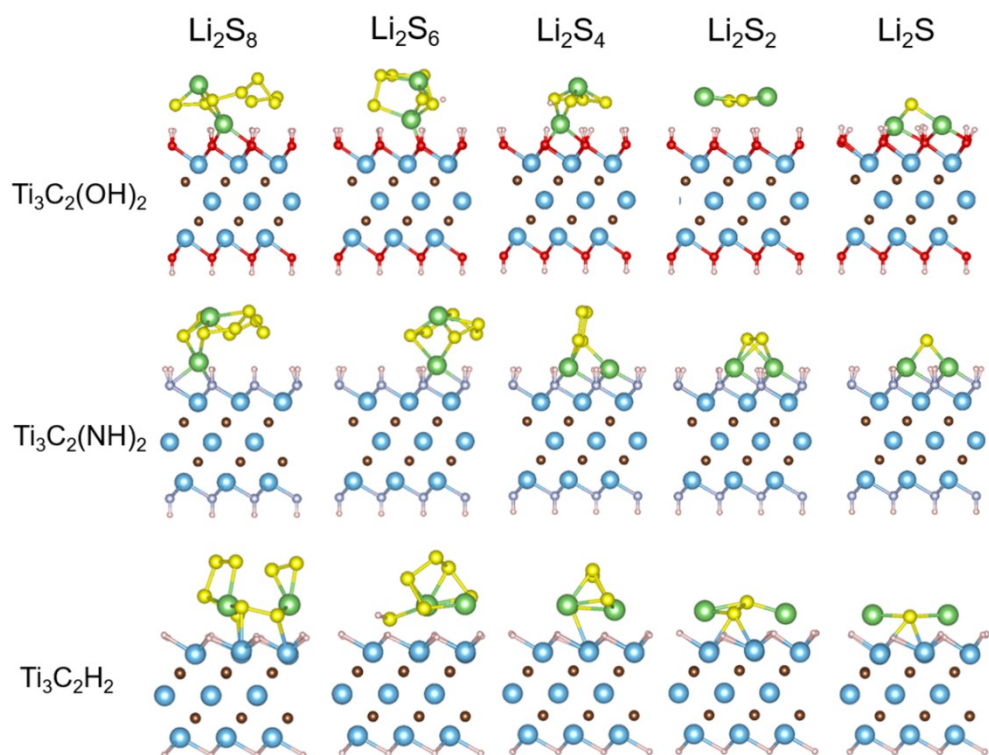

Figure S3 Adsorption configurations of  $Ti_3C_2T_2$  ( $T= OH, NH,$  and  $H$ )- $Li_2S_x$  ( $x=1, 2, 4, 6,$  and  $8$ ).

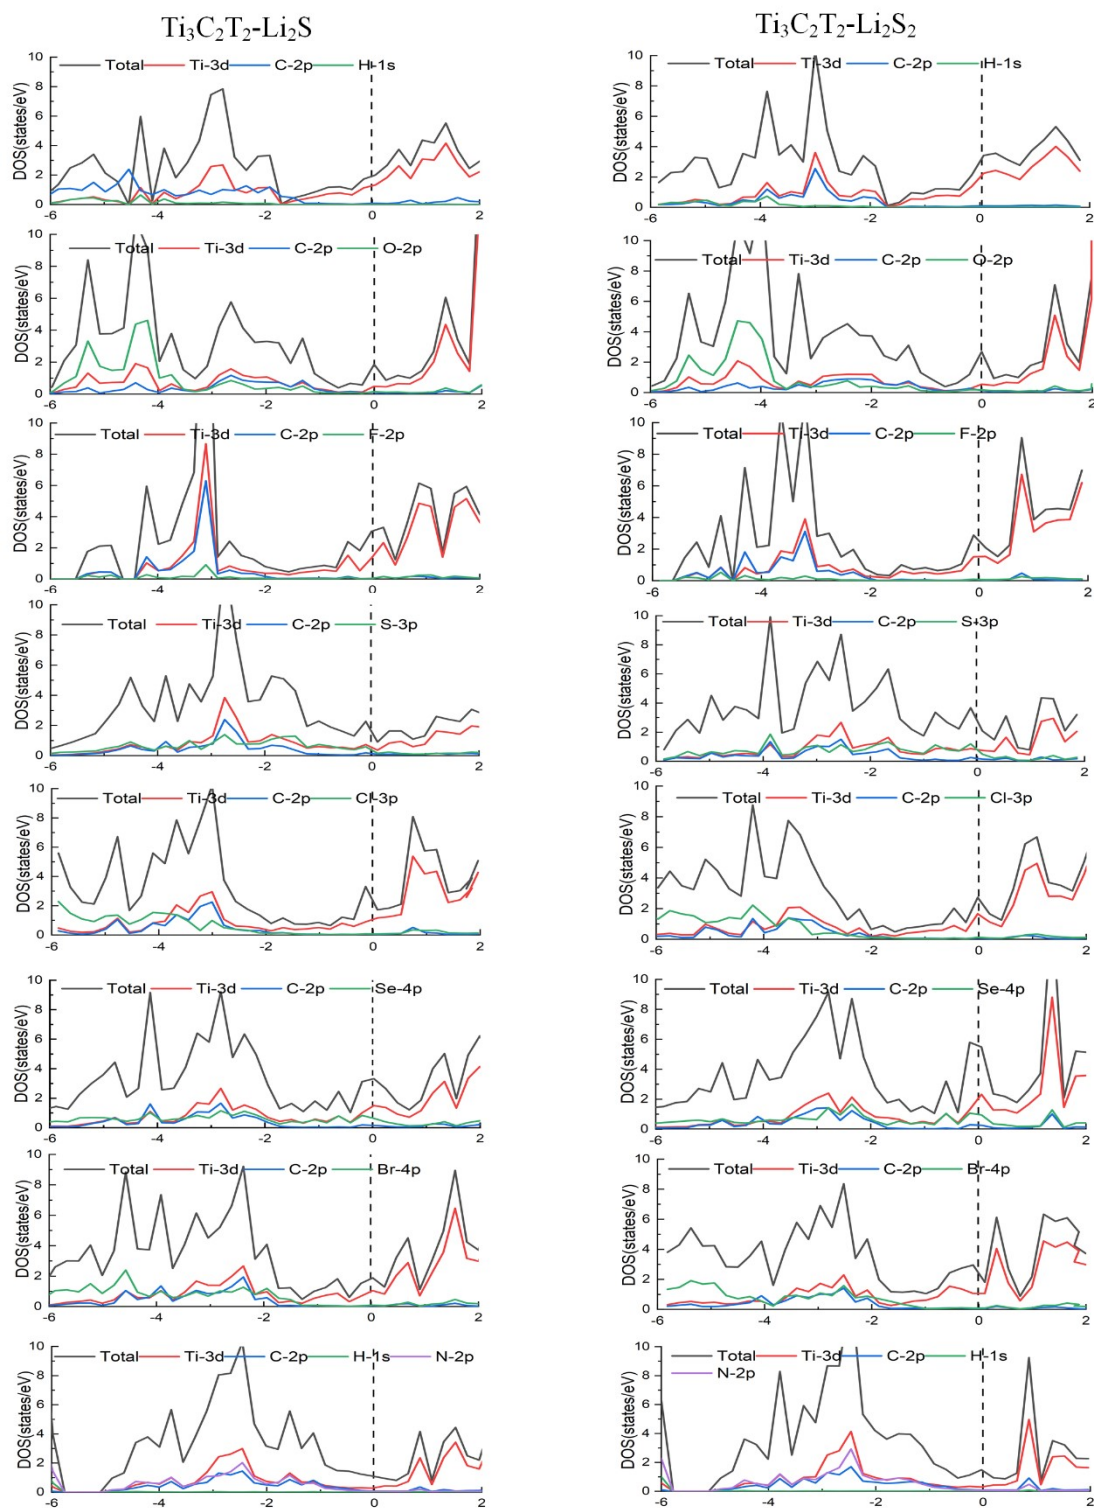

Figure S4 Calculated densities of states (DOS) of the  $\text{Ti}_3\text{C}_2\text{T}_2\text{-Li}_2\text{S}_2/\text{Li}_2\text{S}$  systems (T=H, O, F, S, Cl, Se, Br, NH).



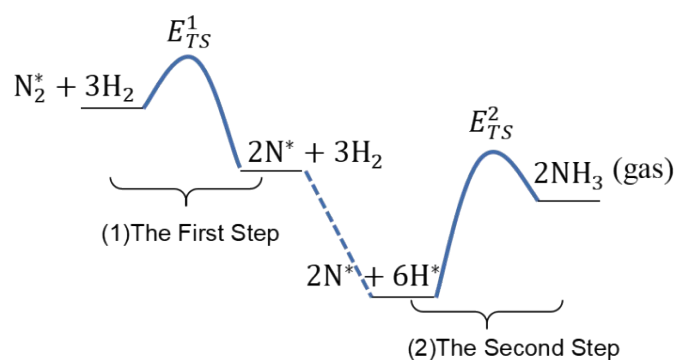

Figure S5 Schematic diagram of the simplified  $N_2$  reduction processes.

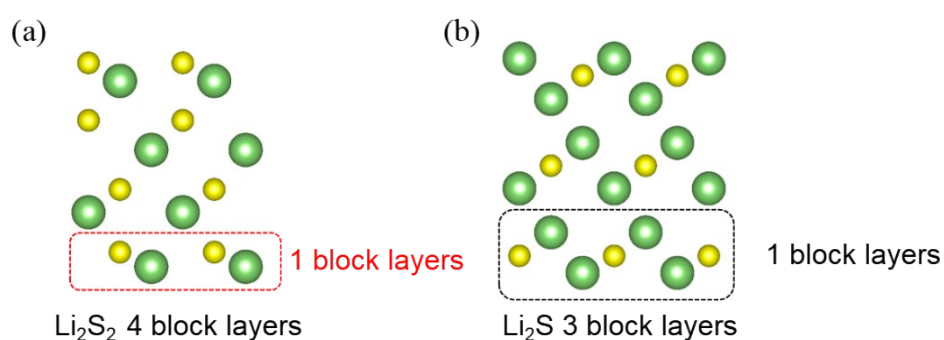

Figure S6 (a) Stabilized  $Li_2S_2$  configuration to simulate its bulk state (4 block layers), (b) Stabilized  $Li_2S$  configuration to simulate its bulk state (3 block layers).

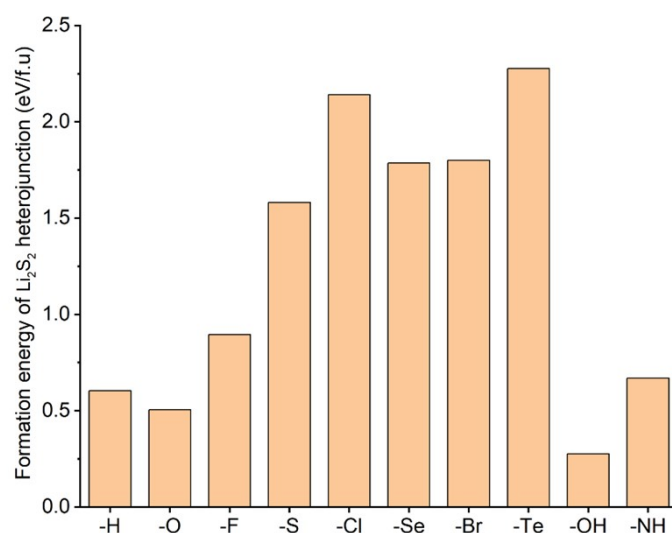

Figure S7 Calculated formation energies of few-layer  $Li_2S_2$  (4 block layers) located on the different substrates of  $Ti_3C_2T_2$  ( $T= H, O, F, S, Cl, Se, Te, Br, OH,$  and  $NH$ ).

Note 3:

It was found that the few-layer  $\text{Li}_2\text{S}_2$  and  $\text{Li}_2\text{S}$  will become stable while their block layers are increased to 4 and 3 (see Figure S6), respectively. Therefore, the heterojunctions were built from the stable few-layer  $\text{Li}_2\text{S}_2$  and  $\text{Li}_2\text{S}$ , and the different functionalized surfaces with a vacuum layer of 15 Å.

The formation energy  $E_f$  for a  $\text{Li}_2\text{S}$ -heterojunction can be expressed as:

$$E_f = \left( E_{\text{heterojunction}} - E_{\text{Ti}_3\text{C}_2\text{T}_2} - E_{\text{Few-layer Li}_2\text{S}} \right) / n$$

where  $E_{\text{heterojunction}}$ ,  $E_{\text{Ti}_3\text{C}_2\text{T}_2}$ , and  $E_{\text{Few-layer Li}_2\text{S}}$  represent the total energies of heterojunction, functionalized  $\text{Ti}_3\text{C}_2\text{T}_x$ , and few-layer  $\text{Li}_2\text{S}$  (3 block layers), respectively.  $n$  ( $n=12$ ) is the number of  $\text{Li}_2\text{S}$  units.

Table S3 Calculated values of  $E_{\text{heterojunction}}$ ,  $E_{\text{Ti}_3\text{C}_2\text{T}_2}$ ,  $E_{\text{Few-layer Li}_2\text{S}}$  and  $E_f$  based on the heterojunction models of  $\text{Ti}_3\text{C}_2\text{T}_x$ -(few-layer)  $\text{Li}_2\text{S}_2$  (T=H, O, F, S, Cl, Se, Br, OH, and NH)

|                                       |                                    |                                    |                                    |                                      |                                      |
|---------------------------------------|------------------------------------|------------------------------------|------------------------------------|--------------------------------------|--------------------------------------|
| eV                                    | $\text{Ti}_3\text{C}_2\text{H}_2$  | $\text{Ti}_3\text{C}_2\text{O}_2$  | $\text{Ti}_3\text{C}_2\text{F}_2$  | $\text{Ti}_3\text{C}_2\text{S}_2$    | $\text{Ti}_3\text{C}_2\text{Cl}_2$   |
| $E_{\text{heterojunction}}$           | -634.05                            | -730.51                            | -681.54                            | -645.61                              | -630.53                              |
| $E_{\text{Ti}_3\text{C}_2\text{T}_2}$ | -493.44                            | -589.44                            | -542.75                            | -528.91                              | -501.00                              |
| $E_{\text{Few-layer Li}_2\text{S}}$   | -148.20                            | -148.20                            | -148.20                            | -148.20                              | -148.20                              |
| $E_f$ (eV/f.u.)                       | 0.63                               | 0.59                               | 0.78                               | 2.62                                 | 1.55                                 |
| eV                                    | $\text{Ti}_3\text{C}_2\text{Se}_2$ | $\text{Ti}_3\text{C}_2\text{Br}_2$ | $\text{Ti}_3\text{C}_2\text{Te}_2$ | $\text{Ti}_3\text{C}_2(\text{OH})_2$ | $\text{Ti}_3\text{C}_2(\text{NH})_2$ |
| $E_{\text{heterojunction}}$           | -662.48                            | -608.86                            | -625.72                            | -790.93                              | -808.72                              |
| $E_{\text{Ti}_3\text{C}_2\text{T}_2}$ | -513.12                            | -481.57                            | -492.39                            | -649.07                              | -667.14                              |
| $E_{\text{Few-layer Li}_2\text{S}}$   | -148.20                            | -148.20                            | -148.20                            | -148.20                              | -148.20                              |
| $E_f$ (eV/f.u.)                       | -0.09                              | 1.74                               | 1.24                               | 0.53                                 | 0.55                                 |
